# Supplementary material for: Graphene oxide/carbon nanotubes–Fe3O4 supported Pd nanoparticles for hydrogenation of nitroarenes and C–H activation
Source: Royal Society of Chemistry journal article supplement (doi:10.1039/c5ra25842a), 2016-01-01
Supplement: c5ra25842a1.pdf [file c5ra25842a1.pdf]

# Graphene oxide/carbon nanotubes-Fe<sub>3</sub>O<sub>4</sub> support Pd nanoparticles for hydrogenation of nitroarenes and C-H activation

Fan Yang<sup>a,‡</sup>, Andong Feng<sup>a,‡</sup>, Chunxia Wang<sup>b</sup>, Sen Dong<sup>a</sup>, Cheng Chi<sup>a</sup>, Xilai Jia,<sup>a</sup> Liqiang Zhang,<sup>a</sup>

Yongfeng Li<sup>a\*</sup>

<sup>a</sup> State Key Laboratory of Heavy oil Processing, China University of Petroleum, Beijing Changping 102249, China  
<sup>b</sup> Beijing National Laboratory for Molecular Sciences, Key Laboratory of Analytical Chemistry for Living Biosystems, Institute of Chemistry, the Chinese Academy of Sciences, Beijing 100190, China.

## Supplementary Material

|    |                                                            |   |
|----|------------------------------------------------------------|---|
| 1. | Materials                                                  | 1 |
| 2. | A schematic illustration of plasma system                  | 2 |
| 3. | SEM and TEM images of Pd-1, Pd-2, Pd-4 and Pd-5            | 2 |
| 4. | The size distribution of Pd nanoparticles                  | 3 |
| 5. | High resolution XPS spectra of Pd 3d of Pd-3               | 4 |
| 6. | Water contact angles of Pd-n                               | 4 |
| 7. | XRD patterns of reused catalyst                            | 5 |
| 8. | General procedure for C-H bond functionalization reactions | 5 |
| 9. | <sup>1</sup> H NMR spectra data                            | 6 |

---

<sup>‡</sup>Both authors contributed equally

\*Corresponding author: Tel: +86-10-89739028, E-mail: yfli@cup.edu.cn (Yongfeng Li)

## 1. Materials

All chemicals were used as received without further purification: graphite powder (200 mesh) (Alfa Aesar, Johnson Matthey Company); Multi-walled carbon nanotubes (Beijing Cnano Technology Limited Purity: > 95%, average length: 10  $\mu\text{m}$ , average diameter: 11 nm); iron (II) oxalate dihydrate (Aladdin Industrial Corporation); palladium acetate (Wako Pure Chemical Industries, Ltd); 1-butyl-3-methylimidazolium-tetrafluoroborate ([BMIM]BF<sub>4</sub>); cuprous iodide (Tokyo Chemical Co., Ltd ); nitrobenzene, 4-nitroanisole, 4-nitrotoluene, cesium fluoride (Sinopharm Chemical Reagent Co., Ltd); 8-nitroquinoline, benzoxazole (Energy Chemical); 1,3-dinitrobenzene, p-nitrobenzoic acid, o-nitrobenzoic acid, methyl 4-nitrobenzoate (Xiya Chemical Industry Co., Ltd); 4-nitrobenzotrile, p-nitroacetophenone, iodobenzene, p-nitrophenol, o-nitrophenol, silver oxide, phenylacetylene (J&K Scientific Co., Ltd); potassium permanganate, ethanol, hydrogen peroxide, tetrahydrofuran, sulfuric acid, phosphoric acid, N,N-dimethylformamide, ammonium chloride, magnesium sulphate (Beijing Chemical Works).

## 2. A schematic illustration of plasma system

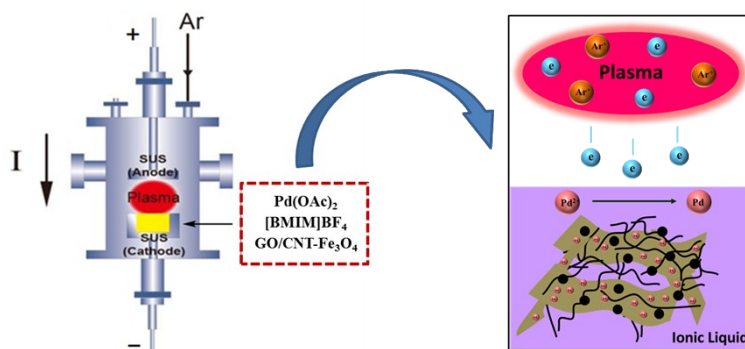

Fig. S1. A schematic illustration of plasma system.

## 3. SEM and TEM images of Pd-1, Pd-2, Pd-4 and Pd-5

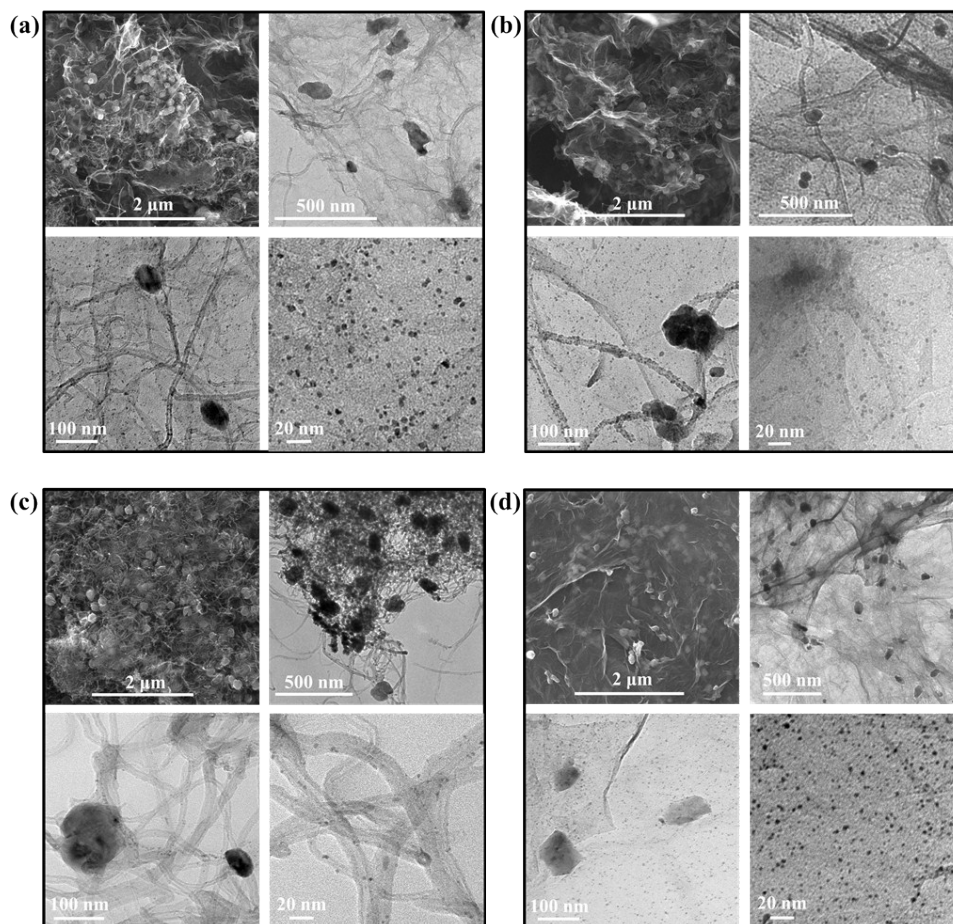

Fig. S2 SEM and TEM images of Pd-1 (a), Pd-2 (b), Pd-4 (c) and Pd-5 (d).

#### 4. The size distribution of Pd nanoparticles

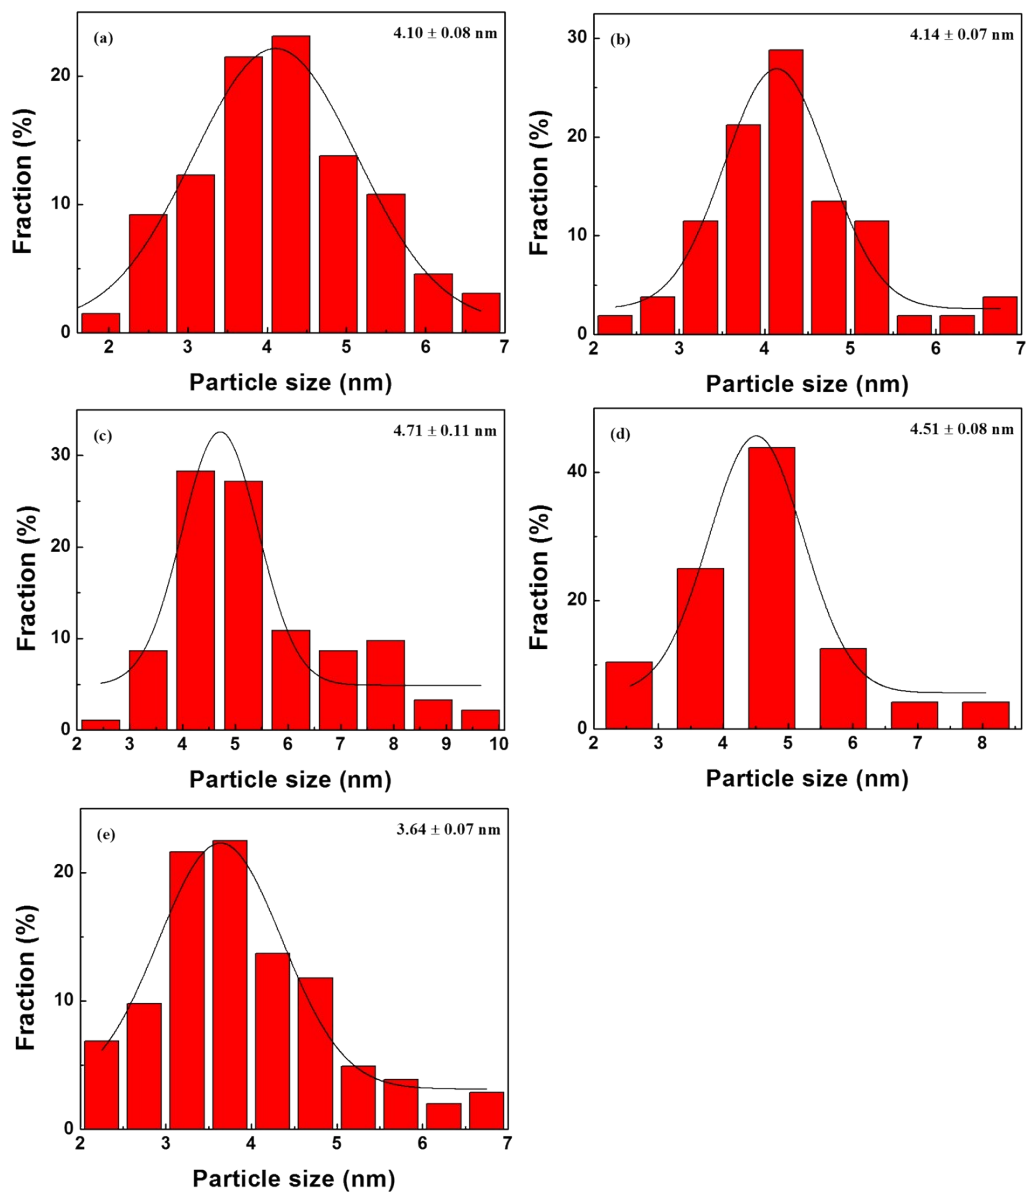

Fig. S3 Particle size distribution of Pd-1 (a), Pd-2 (b), Pd-3 (c), Pd-4 (d) and Pd-5 (e).

## 5. High resolution XPS spectra of Pd 3d of Pd-3

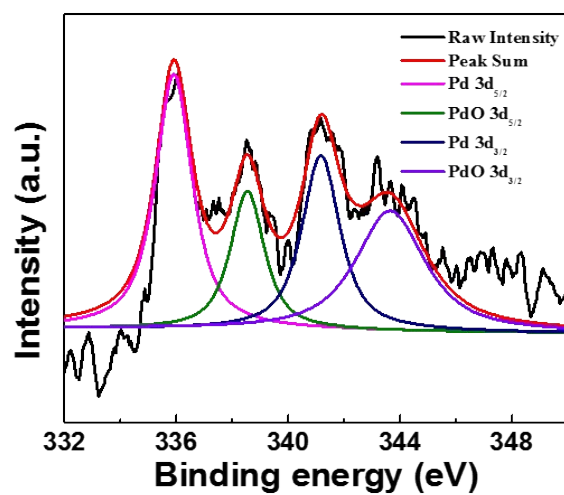

Fig. S4 High resolution XPS spectra of Pd 3d of Pd-3.

## 6. Water contact angles of Pd-n

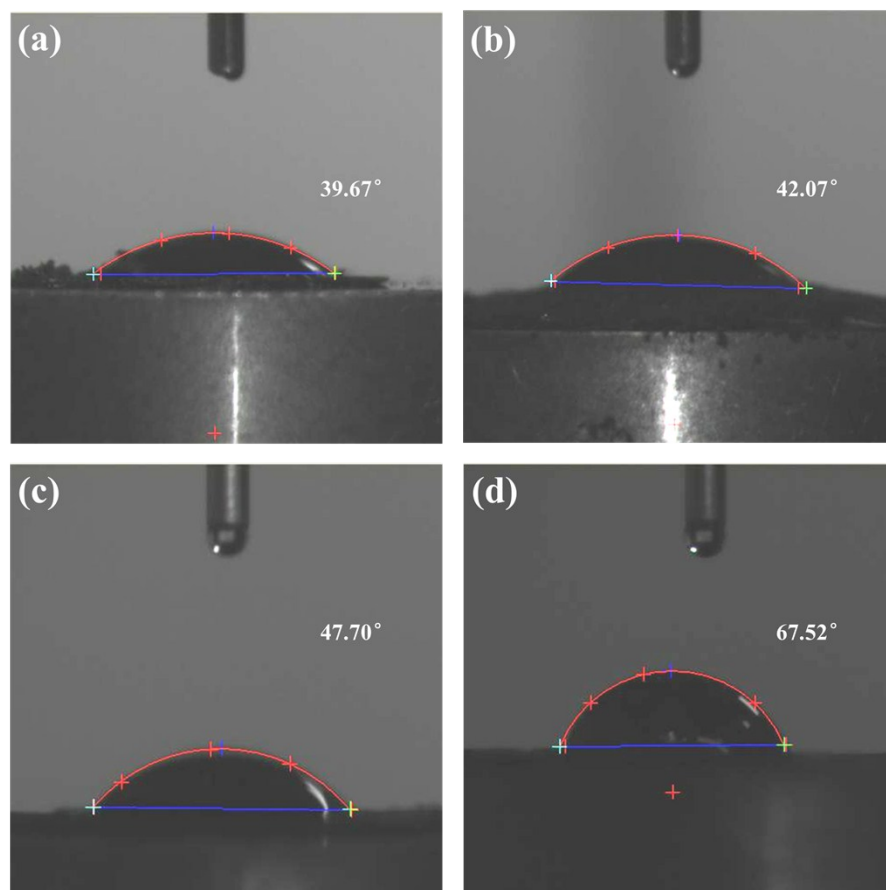

Fig. S5 Water contact angles of Pd-5 (a), Pd-1 (b), Pd-2 (c), and Pd-3 (d).

## 7. XRD patterns of reused catalyst

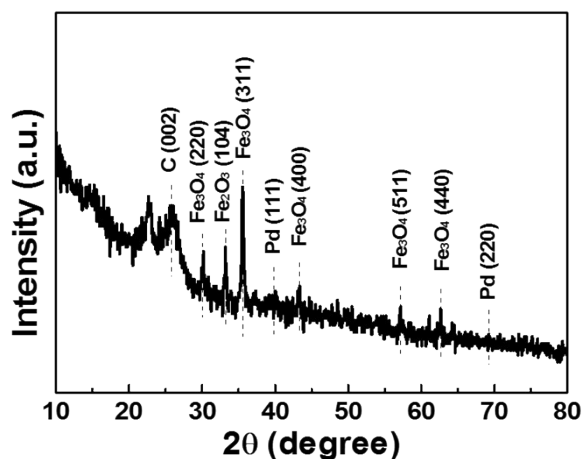

Fig. S6 XRD patterns of reused catalyst.

## 8. General procedure for C-H bond functionalization reactions

### 8.1. Arylation of benzoxazole

To an micro-reaction vial was added CsF (2.5 equiv., 189.9 mg), Pd-3 catalyst (3 mol% , 22 mg) and CuI (2 equiv., 190.5 mg). To this was added benzoxazole (0.5 mmol, 50  $\mu$ L), iodobenzene (1 mmol, 112  $\mu$ L) and DMF (2 mL). The reaction mixture was heated to 140 °C with stirring for 18 h. To the reaction mixture was added satd aq NH<sub>4</sub>Cl (20 mL) and the mixture was stirred in air. The mixture was then extracted into ethyl acetate. The organic layers were combined, dried over MgSO<sub>4</sub>, filtered and the solvent removed under reduced pressure. The resulting brown residue was dry-loaded onto silica gel, and purified by flash chromatography eluting with EtOAc in petroleum ether solvent systems to give the product [1-3].

### 8.2 Glaser coupling reaction of phenylacetylene

To a mixture of Pd-3 catalyst (2 mol%, 14.7 mg) and Ag<sub>2</sub>O (0.5 mmol, 115.9 mg) in THF (2.0 mL) was added phenylacetylene (0.5 mmol, 55  $\mu$ L), and then the mixture was stirred at 60 °C for 12 h [4]. The reaction progress was monitored by TLC. After the phenylacetylene consumed, the solvent was removed under a reduced pressure. The product was filtered through a short silica column with

petroleum ether (60-90 °C) to remove catalyst and then was purified with a silica column using petroleum ether (60-90 °C) as eluent, giving 1,4-diphenylbutadiyne as a white solid.

## 9. <sup>1</sup>H NMR spectra data

**Aniline hydrochloride:** <sup>1</sup>H NMR (300 MHz, CD<sub>3</sub>OD) δ 7.62-7.45 (m, 3H), 7.41 (d, *J* = 8.4 Hz, 2H).

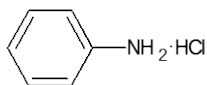

**4-Methylaniline hydrochloride (Table 3, entry 1):** <sup>1</sup>H NMR (400 MHz, CD<sub>3</sub>OD) δ 7.25 (d, *J* = 8.2 Hz, 2H), 7.17 (d, *J* = 8.3 Hz, 2H), 2.29 (s, 3H).

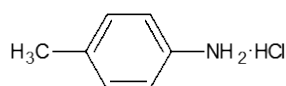

**4-Methoxyaniline hydrochloride (Table 3, entry 2):** <sup>1</sup>H NMR (300 MHz, CD<sub>3</sub>OD) δ 7.41-7.25 (m, 2H), 7.14-6.99 (m, 2H), 3.83 (s, 3H).

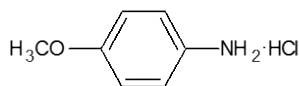

**4-Aminobenzoic acid methyl ester hydrochloride (Table 3, entry 3):** <sup>1</sup>H NMR (300 MHz, CD<sub>3</sub>OD) δ 8.24-8.10 (m, 2H), 7.57-7.50 (m, 2H), 3.93 (s, 3H).

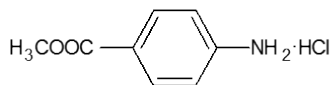

**4-Aminophenol hydrochloride (Table 3, entry 4):** <sup>1</sup>H NMR (300 MHz, CD<sub>3</sub>OD) δ 7.24 (d, 2H), 6.92 (d, *J* = 8.7 Hz, 2H).

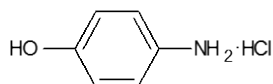

**2-Aminophenol (Table 3, entry 5):** <sup>1</sup>H NMR (300 MHz, , CD<sub>3</sub>OD) δ 6.75-6.55 (m, 4H).

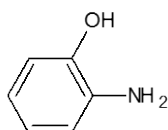

**4-Aminobenzoic acid hydrochloride (Table 3, entry 6):** <sup>1</sup>H NMR (300 MHz, MeOD) δ 8.34-7.84 (m,

2H), 7.74-7.26 (m, 2H).

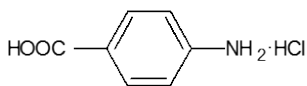

**2-Aminobenzoic acid hydrochloride (Table 3, entry 7):**  $^1\text{H}$  NMR (300 MHz,  $\text{CD}_3\text{OD}$ )  $\delta$  8.22 (d,  $J$  = 7.8 Hz, 1H), 7.76 (t,  $J$  = 7.0 Hz, 1H), 7.68-7.42 (m, 2H).

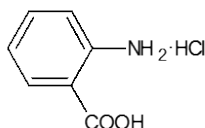

**4-Aminobenzonitrile (Table 3, entry 8):**  $^1\text{H}$  NMR (300 MHz,  $\text{CD}_3\text{OD}$ )  $\delta$  7.92-7.79 (m, 2H), 7.62-7.39 (m, 2H),.

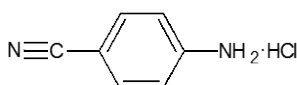

**4-Aminoacetophone (Table 3, entry 9):**  $^1\text{H}$  NMR (300 MHz,  $\text{CDCl}_3$ )  $\delta$  7.77 (d,  $J$  = 8.6 Hz, 2H), 6.61 (d,  $J$  = 8.6 Hz, 2H), 4.15 (br, 2H), 2.47 (s, 3H)

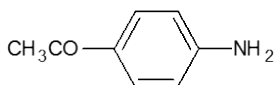

**1,3-Diaminobenzene (Table 3, entry 10):**  $^1\text{H}$  NMR (300 MHz,  $\text{CD}_3\text{OD}$ )  $\delta$  7.77-7.52 (m, 1H), 7.50 (d,  $J$  = 1.9 Hz, 3H).

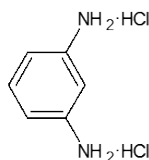

**8-Aminoquinoline (Table 3, entry 11):**  $^1\text{H}$  NMR (300 MHz,  $\text{CD}_3\text{OD}$ )  $\delta$  9.05 (dd,  $J$  = 4.7, 1.6 Hz, 1H), 8.71 (dd,  $J$  = 8.4, 1.5 Hz, 1H), 7.98-7.88 (m, 1H), 7.82 (dd,  $J$  = 8.4, 4.7 Hz, 1H), 7.78-7.68 (m, 2H).

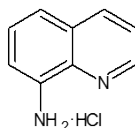

**2-phenylbenzoxazole (5a):**  $^1\text{H}$  NMR (400 MHz,  $\text{CDCl}_3$ )  $\delta$  8.23-8.13 (m, 2H),  $\delta$  7.73-7.55 (m, 1H),  $\delta$  7.55-7.33 (m, 1H),  $\delta$  7.31-7.21 (m, 3H),  $\delta$  7.15 (m, 2H).



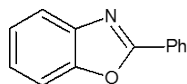

**1,4-diphenylbutadiyne (7a):**  $^1\text{H}$  NMR (400 MHz,  $\text{CDCl}_3$ )  $\delta$  7.55-7.51 (m, 4H),  $\delta$  7.38-7.30 (m, 6H).

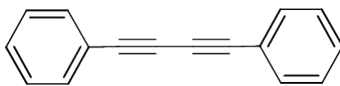

## References

- [1] Baumann CG, De Ornellas S, Reeds JP, Storr TE, Williams TJ, Fairlamb IJ, Tetrahedron. 70 (2014) 6174-6187.
- [2] Yu P, Zhang G, Chen F, Cheng J, Tetrahedron Lett. 53 (2012) 4588-4590.
- [3] Huang J, Chan J, Chen Y, Borths CJ, Baucom KD, Larsen RD, J. Am. Chem. Soc. 132 (2010) 3674-3675.
- [4] Feng X, Zhao Z, Yang F, Jin T, Ma Y, Bao M, J. Organomet. Chem. 696 (2011) 1479-1482.
